29 Due to its simplicity and cost-effectiveness, microscopy has seen extensive field-use as  
30 the diagnostic standard for the detection of soil-transmitted helminths (STH) in stool  
31 samples. However, the sensitivity of microscopy-based detection is inadequate in  
32 reduced-transmission settings where worm burden is oftentimes low. Equally  
33 problematic, eggs of closely related species oftentimes have indistinguishable  
34 morphologies, leading to species misidentification. In light of these shortcomings, the  
35 purpose of this study was to demonstrate multi-parallel quantitative real-time PCR  
36 (qPCR) as the new “gold standard” for STH detection. Accordingly, stool samples from  
37 non-endemic participants were spiked with limited numbers of eggs or larvae (1 to 40)  
38 of five different species of STH. DNA extracts were tested using two unique multi-  
39 parallel real-time PCR-based diagnostic methods. These methods employed different  
40 target sequences (ribosomal internal transcribed spacer, or highly repetitive non-coding  
41 regions), to evaluate the detection of DNA from as little as one egg per sample. There  
42 was a statistically significant kendall correlation between egg/larvae counts and qPCR  
43 from both methods for *Trichuris trichiura* (0.86 and 0.872 for NHM and Baylor assays)  
44 and a strong correlation (0.602 and 0.631 for NHM and Baylor assays, respectively) for  
45 *Ascaris lumbricoides*. Less strong but still significant was the Kendall Tau-b value for *A.*  
46 *duodenale* (0.408 for both) and for *S. stercoralis* (0.483 and 0.653, respectively). In  
47 addition, using field stool samples from rural Argentina both assays had fair to moderate  
48 kappa agreement (0.329-0.454), except for *Strongyloides stercoralis* (0.121) that both  
49 assays had slight agreement. In spite of the small cohort of samples, both qPCR assays,  
50 targeting of two independent genomic regions, provided reproducible results and we  
51 believe that, low cost multi-parallel quantitative real-time PCR-based diagnostics should  
52 supplant microscopy as the new gold standard for stool-based detection of soil  
53 transmitted helminths in public-health and community settings.

54

55

56 **Introduction**

57

58 Soil transmitted helminths (STH) infect over 1.6 billion people worldwide,<sup>1</sup> resulting in  
59 years of disability and extensive morbidity. The most widely employed techniques for  
60 diagnosing STH infections remains microscopy-based, despite the repeated  
61 demonstration of their shortcomings.<sup>2-6</sup> The use of such techniques hinders efforts  
62 aimed at the accurate assessment of infection prevalence and worm burden due to the  
63 poor sensitivity and specificity of the tools, particularly when infection levels are low at  
64 the community level.<sup>7-9</sup> Despite the repeated demonstration of the limitations of  
65 microscopy-based methods<sup>2</sup> they remain the World Health Organization (WHO)-  
66 recommended techniques for use in parasitological and epidemiological interventions  
67 and are almost universally used for the monitoring and evaluation of deworming  
68 programmes.<sup>10</sup> However, the new WHO roadmap 2021-2030 still supports the  
69 development and implementation of a more sensitive tool to confirm the cessation of  
70 an MDA programme and the success of an intervention.<sup>11</sup>

71

72 Over the last two decades, the accretive development of more sensitive molecular tools  
73 for the diagnosis of protozoan and bacterial infections have spurred interest in the  
74 similar development of tools for monitoring STH infections.<sup>11-14</sup> These advances in  
75 molecular testing have largely utilized real-time polymerase chain reaction (PCR). The  
76 primary advantage of real-time PCR over microscopic techniques is its capacity to detect  
77 DNA from shed parasite material, even when infections are of low intensity, or  
78 prevalence is minor. Under such conditions, eggs are more easily missed by microscopy.  
79 Moreover, real-time PCR does not require the use of fresh specimens, a requirement for  
80 the microscopic detection of certain helminths including various hookworm species and  
81 *Strongyloides stercoralis*. Real-time PCR also allows for the parallel detection of other  
82 parasitic agents (e.g. other helminths such as *Schistosoma*, or protists) and the DNA  
83 extraction procedures required for such assays typically do not preclude the conducting  
84 of microbiome studies from the same purified extracts.<sup>15-18</sup> Utilizing PCR the capacity to  
85 harmonize testing across labs also increases, particularly when automation is involved.  
86 <sup>11,19,20</sup> In contrast, microscopic methods are heavily reliant upon extensive training, and

87 operator skill and ability, making inter-lab consistency less easily attainable. Also, real-  
88 time PCR is quantitative and can report the amount of parasite target DNA in a stool  
89 sample, while certain microscopy techniques (e.g. McMasters, Kato-Katz) is  
90 semiquantitative.<sup>21,22</sup> Lastly, and importantly, species appearing to be identical under  
91 the microscope can be differentiated by real-time PCR. However, despite these  
92 advantages, the labour– and equipment–associated costs of both stool processing and  
93 the subsequent molecular analyses have raised concerns over the feasibility of the  
94 technique’s routine use. To overcome these obstacles, efforts are underway to simplify  
95 such techniques, making the underlying technologies increasingly practical, cost-  
96 effective, and field-deployable, in turn facilitating the use of improved diagnostics in the  
97 most challenging of settings.<sup>11,13,14,23</sup>

98  
99 Recognizing that intervention success and informed decision making is highly reliant  
100 upon the use of sensitive and accurate diagnostic tools, the incorporation of molecular  
101 methodologies into various programmatic and research efforts.<sup>11,24–28</sup> Such increased  
102 use has resulted in several attempts to redefine the ‘gold standard’ for STH detection.  
103 However, attempts to comparatively evaluate molecular methods remain minimal, and  
104 nearly all published evaluations compare one or more microscopic techniques with a  
105 solitary molecular method.<sup>8,29–33</sup>

106  
107 Distinct real-time PCR assays targeting a variety of DNA regions (ribosomal internal  
108 transcribed spacer sequences [ITS], ribosomal subunit sequences, or mitochondrial  
109 genes) have been developed in recent years for the detection of STH<sup>12</sup>. Assays that  
110 target ribosomal or mitochondrial sequences can be found in adequate copy number,  
111 providing moderate to high sensitivity, making them attractive real-time PCR targets.  
112 However, while attractive, these targets remain suboptimal. The development of new  
113 bioinformatics tools has significantly facilitated the identification and optimization of  
114 assays that target highly repetitive elements, reducing both the time and money  
115 expended for their identification. Such targets have improved both the sensitivity and

116 specificity of real-time PCR assays, enabling the differentiation of closely related species,  
117 and facilitating target detection at copy numbers below those found within a single egg.  
118 <sup>11,34–36</sup>

119 The goal of this study was to provide an assessment of the overall agreement when two  
120 distinct molecular assays utilizing different target sequences are compared across a  
121 panel of samples spiked with known quantities of STH eggs or larvae. Similar testing was  
122 also performed on a panel of field-collected samples, to assess the transferability of  
123 results. General agreement would provide strong evidence for the definitive  
124 consideration of real-time PCR as the gold standard for STH detection. Results will also  
125 highlight platform-specific strengths and weaknesses, informing choices in an  
126 application-specific manner. To the best of our knowledge, this is the first comparison of  
127 two independent real-time PCR platforms, with unique molecular targets, utilizing  
128 samples spiked with known numbers of STH eggs or larvae.

129

## 130 **Materials and methods**

131

### 132 **Ethical Approval, consents and permissions**

133 This project was approved by the bioethics committee of Colegio de Médicos de la  
134 Provincia de Salta on 19 March 2015 and the internal review boards of Baylor Medical  
135 College of Medicine (protocol number H-34926). Informed written consent was  
136 obtained from each subject or from subject's parent/guardian as appropriate. All  
137 patients in Orán, Argentina were treated, free of charge, with albendazole and  
138 ivermectin (prior to the study or after based on microscopy findings).

139

### 140 **Field Sample Collection**

141 A panel of 130 samples was collected from a random cohort of subjects ages five to 12  
142 years old living in Salta, Argentina. Collection of samples were part of ongoing field  
143 studies. All samples immediately underwent microscopic analysis and were

144 subsequently placed in the freezer, without preservative, until DNA extraction and  
145 subsequent qPCR analysis occurred.

146

#### 147 **Microscopy**

148 Stool samples were examined by Telemann concentration microscopy, Baermann,  
149 Harada Mori, McMaster egg-counting technique, with some modifications<sup>8</sup> and  
150 sedimentation method at the time of sample drop-off, using protocols previously  
151 published.<sup>8</sup> The McMaster method was performed following a standard procedure: 2g  
152 of stool was filtered and homogenized with 30ml of saturated saline solution. Upon  
153 loading two flotation chambers for each sample, the eggs were allowed to float for five  
154 minutes and then counted. The number derived, was multiplied by 50, in order to  
155 calculate eggs per gram (epg).

156

157 Real-time PCR was compared directly with samples that were positive with any of the  
158 microscopy techniques employed.

159

#### 160 **Control stool for spiking**

161 The control human stool used in the study was collected from an individual in a non-  
162 endemic area for parasites who had never travelled. Stool was immediately stored at -  
163 20 °C. At the time of collection.

164

#### 165 **Parasite/Egg collection for spiking**

166 Larvae and STH eggs were collected from a field clinic in Orán, Argentina. Upon arrival at  
167 the clinic, fresh fecal material underwent processing for the identification of STH and  
168 protozoa present in the specimen. All processing occurred using the McMaster's  
169 technique (magnification). Eggs/larvae present within positive samples were carefully  
170 removed from the samples under the microscope, rinsed with nuclease free water, and  
171 placed in cryovials for storage at -20 °C. Samples remained at -20 °C until shipment to

172 Baylor College of Medicine where known quantities of eggs/larvae were utilized for the  
173 spiking of the control stool samples.

174

#### 175 **Spiked stool & DNA extraction**

176 Known numbers of parasitic eggs/larvae (1, 2, 5, 10, 20, 40) were used to spike 10 mg  
177 samples of naïve stool, at Baylor College. The entire sample then underwent DNA  
178 extraction using the Fast DNA Spin Kit for Soil (MP Biomedicals, Santa Ana, CA) as  
179 previously described.<sup>7</sup> One half of the elution volume of each sample was kept at Baylor  
180 College for qPCR testing, and the remaining volume was shipped to the Natural History  
181 Museum for parallel independent analysis.

182

#### 183 **Field samples & DNA extraction**

184 A total of 500 mg of stool from each field sample was subjected to DNA extraction at  
185 Baylor College of Medicine. Samples were again extracted using the Fast DNA Spin Kit  
186 for Soil as described above. However, to facilitate the detection of *T. trichiura*, an  
187 additional step was incorporated into the procedure. This addition to the protocol  
188 resulted in a second elution volume from each sample, specifically for use with the *T.*  
189 *trichiura* detection assay.<sup>7</sup> As described above, one half of the elution volume from  
190 each sample remained at Baylor College of Medicine where all samples underwent qPCR  
191 analysis, while remaining aliquots were sent to Smith College for parallel and  
192 independent testing.

193

#### 194 **Multi-parallel real-time PCR assays**

195 DNA extracts from all spiked samples were assayed independently at both Baylor  
196 College of Medicine and the Natural History Museum (NHM).

197

#### 198 • **ITS regions and 18S rRNA-targeting real-time PCR (Baylor College)**

199 At Baylor College of Medicine, multi-parallel qPCR was performed using the same  
200 reaction conditions and employing the same species-specific (except for *Ancylostoma*)

201 primers and FAM-labeled minor-groove-binding probes as previously described<sup>7</sup>  
202 (ThermoFisher, Waltham, MA). Henceforth, these assays will be referred to as ‘Baylor  
203 assay’. All samples were run on a ThermoFisher ABI ViiA7 PCR machine in duplicate with  
204 default parameters and 40 cycles as the cut-off. DNA concentrations were calculated  
205 using a standard curve.

206

207 • **Repeat-targeting real-time PCR (Smith College/NHM)**

208 At the Natural History Museum, multi-parallel qPCR was performed using the same  
209 reaction conditions and employing the same species-specific primers and FAM-labelled  
210 double quenched probes as previously described.<sup>34</sup> Hereafter, these assays will be  
211 referred to as ‘NHM assay’. All samples were tested using a StepOne Plus Real-time PCR  
212 instrument and all reactions were run in duplicate. For each sample, DNA target copy  
213 number per ul of reaction was calculated based on an intra-plate standard curve (run in  
214 triplicate).

215

216 **Statistical analysis**

217 To assess the correlation between DNA quantity (fg/ul or copies/ul) and spiked egg  
218 numbers, the Kendall rank correlation test was used (preferred for small datasets). The  
219 Kendall Tau-b value was chosen as it adjusts for tied ranks. Kendall Tau-b values range  
220 between minus one (all pairs are discordant) and one (all pairs are concordant); a higher  
221 Tau-b value indicates more concordant than discordant pairs of individual egg counts  
222 and therefore higher overall correlation<sup>37</sup>; interpretation as < + or - 0.10: very weak; + or  
223 -0.10 to 0.19: weak; + or - 0.20 to 0.29: moderate; + or - 0.30 or above: strong. The  
224 correlations were visualized in R version (3.1.3); *Necator americanus* was excluded from  
225 the graphs due to few data points, but the correlation values are still shown in Table 1.

226 P values <0.05 were considered statistically significant. The comparisons between the  
227 two distinct molecular approaches were depicted using unweighted Cohen’s Kappa  
228 agreement<sup>38</sup> which accounts for the possibility that concordance between the two



229 assays compared herein may occur by chance. Kappa < 0 means 'No agreement'; 0 —  
230 .20 defines 'slight agreement'; .21 — .40 'Fair'; .41 — .60 'Moderate'; .61 — .80  
231 'Substantial'; .81–1.0 'Perfect'. Fleiss kappa was calculated to evaluate the agreement  
232 between the microscopy and the 2 qPCR tests (3 raters), treating the results as  
233 categorical values (presence/absence). All kappa agreements were calculated using R  
234 version 3.1.3 and R package 'irr'.

235

## 236 **Results**

### 237 **Spiked samples**

238 The Kendall Tau-b value was 0.86 and 0.872 for *T. trichiura*, for both NHM and Baylor  
239 assays, respectively, indicating a strong concordance between DNA quantity measured  
240 using qPCR and egg numbers. For *A. lumbricoides*, the Tau-b value of 0.602 and 0.631  
241 for NHM and Baylor assay, respectively, also showing a strong concordance. Less strong  
242 but still significant was the Tau-b value for *A. duodenale* (0.408 for both), using both  
243 assays, and for *S. stercoralis* (0.483 and 0.653, respectively). Results for *N. americanus*  
244 remain puzzling (with 0 and -0.816 Tau-b value for NHM and Baylor, respectively),  
245 probably due to insufficient number of eggs/larvae for that species (Table 1).

246

247 The graphs in Figures 1 and 2 also show the linearity and correlation between the qPCR  
248 quantitative method and eggs or larvae spiked.

249

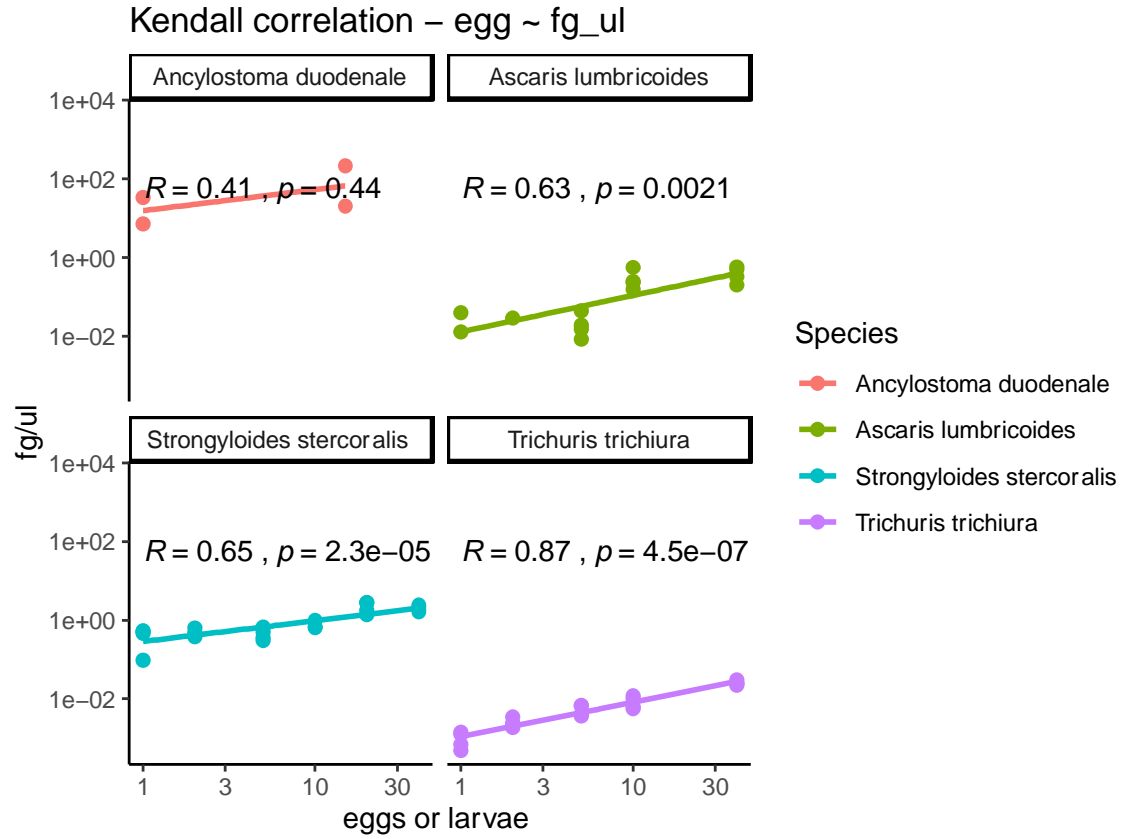

250  
251  
252  
253

Figure 1. Kendall correlations for Baylor assays, between eggs or larvae and fg/ul for all soil-transmitted helminths except for *N. americanus* due to insufficient number of larvae

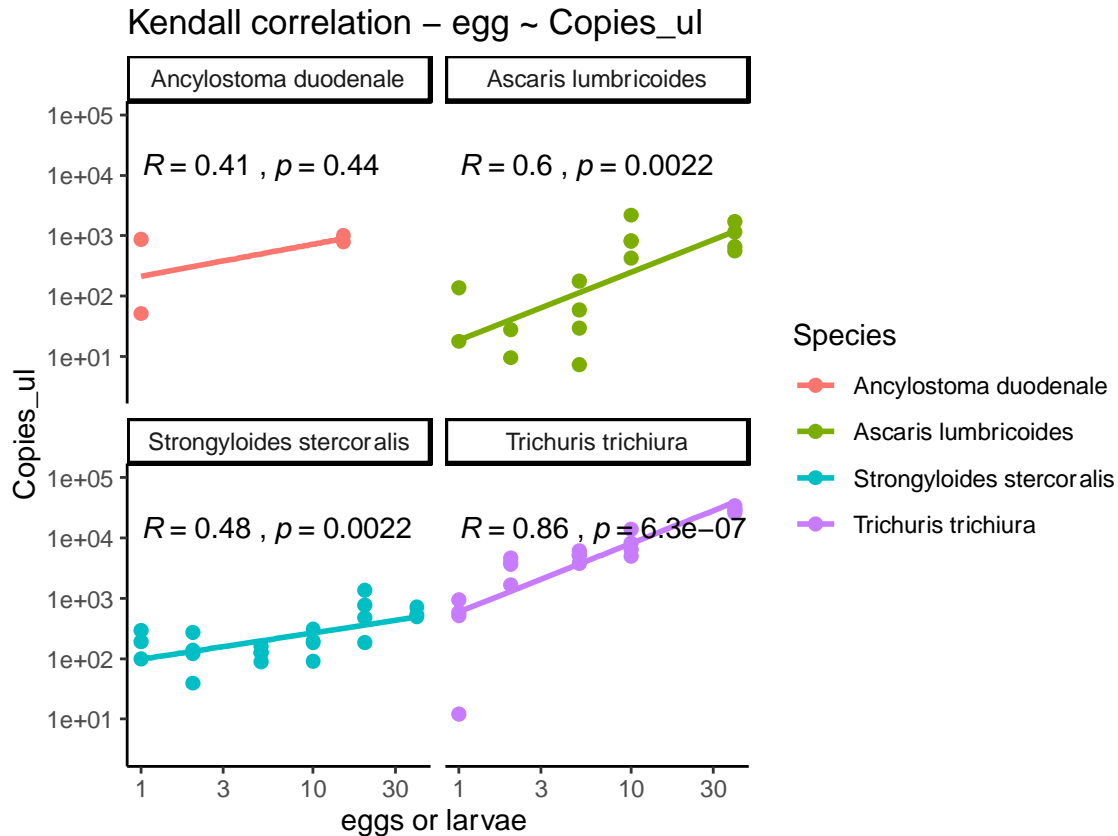

254

255 Figure 2. Kendall correlations for NHM/Smith assays, between eggs or larvae and fg/ul for all soil-transmitted  
 256 helminths except for *N. americanus* due to insufficient number of larvae

257

258 Table 1 – Kendall correlation as Tau-b value and respective p values, between number of larvae/eggs  
 259 and qPCR quantitative method for each soil-transmitted helminth for both NHM/Smith and Baylor  
 260 assays

| Species                          | Kendall correlation egg/larvae vs quantitative method |          |        |          |
|----------------------------------|-------------------------------------------------------|----------|--------|----------|
|                                  | NHM                                                   | p-value  | Baylor | p-value  |
| <i>Ancylostoma duodenale</i>     | 0.408                                                 | 0.44     | 0.408  | 0.44     |
| <i>Ascaris lumbricoides</i>      | 0.602                                                 | 0.0022   | 0.631  | 0.0021   |
| <i>Necator americanus</i>        | 0                                                     | 1        | -0.816 | 0.12     |
| <i>Strongyloides stercoralis</i> | 0.483                                                 | 0.0022   | 0.653  | 2.30E-05 |
| <i>Trichuris trichiura</i>       | 0.86                                                  | 6.30E-07 | 0.872  | 4.50E-07 |

261

262

263 **Field samples**

264 We calculated both overall percentage agreement (total number of agreed positives or  
 265 negatives in a given sample set) and Cohen’s kappa for agreement on a sample-by-  
 266 sample case, for both sets of qPCR assays, treating data as categorical values  
 267 (presence/absence), since the qPCR output interpretation is still not corresponding  
 268 directly to worm burden or worm intensity. To show the greater discordance between  
 269 microscopy and both qPCR assays, we calculated Fleiss kappa; results are show in Table  
 270 2.

271  
 272 Between the two sets of qPCR assays, there was a moderate agreement for *A.*  
 273 *lumbricoides* and a fair agreement for *N. americanus* (*kappa value = 0.329*), *T. trichiura*  
 274 (*kappa value = 0.366*) and *A. duodenale* (*kappa value = 0.279*), though both assays  
 275 showed a slight agreement for *S. stercoralis* (*kappa value = 0.121*).

276  
 277 Fleiss kappa showed slight agreement between microscopy (ranging from 0.0639 to  
 278 0.219) and both qPCR assays (Table 2).

279  
 280 Table 2 – Cohen’s kappa (unweighted) for inter-rater reliability comparison between the two  
 281 qPCR methods, treating the data as categorical variables (presence/absence); kappa cheat sheet  
 282 <0 No agreement; 0 – 0.20 Slight; 0.21 – 0.40 Fair; 0.41 – 0.60 Moderate; 0.61 – 0.80  
 283 Substantial; 0.81–1.0 Perfect

|                                  | Two qPCRs - RJ and NHM (two raters) |                      |          | Fleiss kappa               |          |
|----------------------------------|-------------------------------------|----------------------|----------|----------------------------|----------|
|                                  | Unweighted Cohen's Kappa agreement  | Percentage agreement | p-value  | Fleiss kappa (categorical) | p-value  |
| <i>Necator americanus</i>        | 0.329                               | 82%                  | 6.66E-16 | 0.214                      | 0        |
| <i>Trichuris trichiura</i>       | 0.366                               | 96%                  | 0        | 0.178                      | 1.53E-09 |
| <i>Ancylostoma duodenale</i>     | 0.279                               | 64%                  | 3.77E-15 | 0.152                      | 6.39E-11 |
| <i>Strongyloides stercoralis</i> | 0.121                               | 77%                  | 0.000471 | 0.0639                     | 0.0186   |
| <i>Ascaris lumbricoides</i>      | 0.454                               | 92%                  | 0.00E+00 | 0.219                      | 9.14E-12 |

284

285

286

287 **Discussion**

288 We present a comparative study evaluating two independent, quantitative real-time  
289 PCR assays for five soil-transmitted helminths using both spiked and field samples. By  
290 comparing spiked samples using different target DNA sites, we showed concordance  
291 and moderate to strong correlation not only to the presence of helminth egg or larvae,  
292 but also quantitatively to the amount of parasite DNA.

293

294 Such strong correlation between spiked eggs and qPCR output has been previously  
295 demonstrated in similar settings.<sup>33</sup> However, this is the first pilot study utilizing two  
296 sets of qPCR targeting different genomic sequences.

297

298 The great discordance between both qPCR sets and microscopy depicts the superiority  
299 in sensitivity (true positives) and specificity (true negatives) of the molecular methods  
300 compared to coprological tests.

301

302 *1. qPCR a potential tool for “true negatives”*

303 A key advantage of using qPCR is the high negative predictive value of determining a  
304 sample that does not have a parasitic infection.<sup>8</sup> The value of a test with high negative  
305 predictive value, such as qPCR, is evident in public health and epidemiology endeavors.  
306 Population studies on the community prevalence of STH relies on the number of  
307 subjects that do not have a parasite. Thus, demonstrating not needing therapy or follow  
308 up care provides data for planning and prioritizing resource for individual care. The  
309 ability to rule out a STH diagnosis is also valuable in mass drug administration (MDA)  
310 programs. A test that can reliably show the efficacy of MDA on a population level will  
311 note progress of STH eradication campaigns.

312

313 *2. Monitoring the qPCR outputs, pre and post MDA*

314 Another value, especially in MDA programs, is monitoring the change of parasitic DNA  
315 post-treatment. By using these molecular assays, the quantity of parasite DNA, which is  
316 a proxy for parasite eggs and larvae, can be observed and followed for treatment  
317 efficacy or failure. Since the two tests presented in this study detect different DNA  
318 sequences, they cannot be used interchangeably when monitoring changes in DNA  
319 concentrations. Similar studies to the current one have shown qPCR as a promising tool  
320 to estimate intensity of infection<sup>29,33</sup> but further studies are still needed to not only  
321 identify a universal consensus for qPCR diagnostics for STHs, but to also to establish  
322 qPCR as a standalone tool for estimating worm burden in the absence of coprological  
323 methods.

324

325 Thus, whilst still more studies are needed to achieve a reliable correlation between epg  
326 number and intensity of infection to qPCR outputs, a near term goal moving forward  
327 would be to collectively assess the parasitic burden through PCR output, in a population  
328 as a whole, rather than at the individual level.

329

### 330 *3. Capacity building*

331 An important component of using these molecular assays is transferring the technology  
332 to build capacity in resource-limited areas.<sup>8,29,32,39,40</sup> Supporting the WHO 2021-2030  
333 roadmap<sup>41</sup>, building diagnostics facilities in-country can prove beneficial beyond  
334 diagnostics for STHs. Similar workflows can be used for screening of other parasites and  
335 knowledge transfer on diagnostics can create empowerment in local, in-country groups  
336 and generate more research funds and establish capacity building and integrate training  
337 as part of routine health activities.

338

### 339 *4. Limitations*

340 We acknowledge the number of spiked samples (eggs and larvae) trialed in this study  
341 was limited and requires further scaling. qPCR could replace coprological tools in low-  
342 intensity endemic for STHs area, therefore, we only focused on spiking stool samples

343 with very low numbers of eggs/larvae. Another limitation was that an extraction control,  
344 to check the efficacy of the DNA extraction method, was not available. Perhaps a ‘failed’  
345 extraction in the samples spiked with a single egg explains the 0 and negative  
346 correlation for both assays for *N. americanus*. Controls should be used, not only for  
347 accurate quantitation of PCR via standards, but for both the efficacy of the extractions  
348 and the efficacy of the PCR (i.e., detecting inhibition).

349

### 350 *5. Conclusion*

351 We present supporting evidence that qPCR is a valid replacement for fecal microscopy  
352 and our brief, pilot exercise supports current work<sup>33</sup> towards replacing coprological  
353 tools to assess low STH infections using PCR. Different laboratories prefer and favor  
354 different targets, but our pilot study has shown that any PCR is better than no PCR at all  
355 when STH infections are low in a population. Using spiked and field samples we  
356 conclude that qPCR can be pursued towards a gold standard for detection of STH and  
357 can be successfully deployed in resource-limited countries.

358

### 359 **Conflict of interest**

360 All authors declare no conflict of interest

361

### 362 **References**

363

- 364 1. Jourdan PM, Lamberton PHL, Fenwick A, Addiss DG., 2018. Soil-transmitted  
365 helminth infections. *Lancet* 391: 252–265
- 366 2. Nikolay B, Brooker SJ, Pullan RL., 2014. Sensitivity of diagnostic tests for human soil-  
367 transmitted helminth infections: a meta-analysis in the absence of a true gold  
368 standard. *Int J Parasitol* 44: 765–774
- 369 3. Zendejas-Heredia PA, Colella V, Hii SF, Traub RJ., 2021. Comparison of the egg  
370 recovery rates and limit of detection for soil-transmitted helminths using the Kato-  
371 Katz thick smear, faecal flotation and quantitative real-time PCR in human stool.  
372 *PLoS Negl Trop Dis* 15: e0009395
- 373 4. van Mens SP, Aryeetey Y, Yazdanbakhsh M, van Lieshout L, Boakye D, Verweij JJ.,  
374 2013. Comparison of real-time PCR and Kato smear microscopy for the detection of

- 375 hookworm infections in three consecutive faecal samples from schoolchildren in  
376 Ghana. *Trans R Soc Trop Med Hyg* 107: 269–271
- 377 5. Llewellyn S, Inpankaew T, Nery SV, Gray DJ, Verweij JJ, Clements ACA, Gomes SJ,  
378 Traub R, McCarthy JS., 2016. Application of a Multiplex Quantitative PCR to Assess  
379 Prevalence and Intensity Of Intestinal Parasite Infections in a Controlled Clinical  
380 Trial. *PLOS Negl Trop Dis* 10: e0004380
- 381 6. Phuphisut O, Yoonuan T, Sanguankiat S, Chaisiri K, Maipanich W, Pubampen S,  
382 Komalamisra C, Adisakwattana P., 2014. Triplex polymerase chain reaction assay for  
383 detection of major soil-transmitted helminths, *Ascaris lumbricoides*, *Trichuris*  
384 *trichiura*, *Necator americanus*, in fecal samples. *Southeast Asian J Trop Med Public*  
385 *Health* 45: 267–275
- 386 7. Mejia R, Vicuña Y, Broncano N, Sandoval C, Vaca M, Chico M, Cooper PJ, Nutman  
387 TB., 2013. A novel, multi-parallel, real-time polymerase chain reaction approach for  
388 eight gastrointestinal parasites provides improved diagnostic capabilities to  
389 resource-limited at-risk populations. *Am J Trop Med Hyg* 88: 1041–1047
- 390 8. Cimino RO, Jeun R, Juarez M, Cajal PS, Vargas P, Echazú A, Bryan PE, Nasser J,  
391 Krolewiecki A, Mejia R., 2015. Identification of human intestinal parasites affecting  
392 an asymptomatic peri-urban Argentinian population using multi-parallel  
393 quantitative real-time polymerase chain reaction. *Parasit Vectors* 8: 380
- 394 9. Ricciardi A, Ndao M., 2015. Diagnosis of parasitic infections: what's going on? *J*  
395 *Biomol Screen* 20: 6–21
- 396 10. Montesor A, À Porta N, Albonico M, Gabrielli AF, Jankovic D, Fitzpatrick C,  
397 Vercruysse J, Levecke B., 2015. Soil-transmitted helminthiasis: the relationship  
398 between prevalence and classes of intensity of infection. *Trans R Soc Trop Med Hyg*  
399 *109*: 262–267
- 400 11. Papaikovou M, Littlewood DTJ, Gasser RB, Anderson RM., 2021. How qPCR  
401 complements the WHO roadmap (2021–2030) for soil-transmitted helminths.  
402 *Trends in Parasitology* 0
- 403 12. Nutman TB, O'Connell EM., 2016. Molecular Diagnostics for Soil-Transmitted  
404 Helminths. *The American Journal of Tropical Medicine and Hygiene* 95: 508–513
- 405 13. Autier B, Gangneux J-P, Robert-Gangneux F., 2020. Evaluation of the Allplex™  
406 Gastrointestinal Panel-Parasite Assay for Protozoa Detection in Stool Samples: A  
407 Retrospective and Prospective Study. *Microorganisms* 8
- 408 14. Autier B, Gangneux J-P, Robert-Gangneux F., 2021. Evaluation of the Allplex™ GI-  
409 Helminth(I) Assay, the first marketed multiplex PCR for helminth diagnosis. *Parasite*  
410 *28*: 33
- 411 15. Gordon CA, Krause L, McManus DP, Morrison M, Weerakoon KG, Connor MC,  
412 Olveda RM, Ross AG, Gobert GN., 2020. Helminths, polyparasitism, and the gut  
413 microbiome in the Philippines. *Int J Parasitol* 50: 217–225
- 414 16. Rosa BA, Supali T, Gankpala L, Djuardi Y, Sartono E, Zhou Y, Fischer K, Martin J, Tyagi  
415 R, Bolay FK, Fischer PU, Yazdanbakhsh M, Mitreva M., 2018. Differential human gut  
416 microbiome assemblages during soil-transmitted helminth infections in Indonesia  
417 and Liberia. *Microbiome* 6: 33



- 418 17. Formenti F, Cortés A, Brindley PJ, Cantacessi C, Rinaldi G., 2020. A bug's life: Delving  
419 into the challenges of helminth microbiome studies. *PLoS Negl Trop Dis* 14:  
420 e0008446
- 421 18. Mejia R, Damania A, Jeun R, Bryan PE, Vargas P, Juarez M, Cajal PS, Nasser J,  
422 Krolewiecki A, Lefoulon E, Long C, Drake E, Cimino RO, Slatko B., 2020. Impact of  
423 intestinal parasites on microbiota and cobalamin gene sequences: a pilot study.  
424 *Parasit Vectors* 13: 200
- 425 19. Schuurs TA, Koelewijn R, Brienen EAT, Kortbeek T, Mank TG, Mulder B, Stelma FF,  
426 van LL, van HJJ., 2018. Harmonization of PCR-based detection of intestinal  
427 pathogens: experiences from the Dutch external quality assessment scheme on  
428 molecular diagnosis of protozoa in stool samples. *Clinical Chemistry and Laboratory  
429 Medicine (CCLM)* 56: 1722–1727
- 430 20. Cools P, van Lieshout L, Koelewijn R, Addiss D, Ajjampur SSR, Ayana M, Bradbury RS,  
431 Cantera JL, Dana D, Fischer K, Imtiaz R, Kabagenyi J, Lok J, McCarthy J, Mejia R, et  
432 al., 2020. First international external quality assessment scheme of nucleic acid  
433 amplification tests for the detection of *Schistosoma* and soil-transmitted helminths,  
434 including *Strongyloides*: A pilot study. *PLOS Neglected Tropical Diseases* 14:  
435 e0008231
- 436 21. Papaikovou M, Gasser RB, Littlewood DTJ., 2019. Quantitative PCR-Based  
437 Diagnosis of Soil-Transmitted Helminth Infections: Faecal or Fickle? *Trends Parasitol*  
438 35: 491–500
- 439 22. Mbong Ngwese M, Prince Manouana G, Nguema Moure PA, Ramharter M, Esen M,  
440 Adégnika AA., 2020. Diagnostic Techniques of Soil-Transmitted Helminths: Impact  
441 on Control Measures. *Tropical Medicine and Infectious Disease* 5: 93
- 442 23. Cunningham LJ, Stothard JR, Osei-Atweneboana M, Armoo S, Verweij JJ, Adams ER.,  
443 2018. Developing a real-time PCR assay based on multiplex high-resolution melt-  
444 curve analysis: a pilot study in detection and discrimination of soil-transmitted  
445 helminth and schistosome species. *Parasitology* 145: 1733–1738
- 446 24. Khurana S, Sethi S., 2017. Laboratory diagnosis of soil transmitted helminthiasis.  
447 *Tropical Parasitology* 7: 86
- 448 25. Werkman M, Wright JE, Truscott JE, Easton AV, Oliveira RG, Toor J, Ower A,  
449 Ásbjörnsdóttir KH, Means AR, Farrell SH, Walson JL, Anderson RM., 2018. Testing  
450 for soil-transmitted helminth transmission elimination: Analysing the impact of the  
451 sensitivity of different diagnostic tools. *PLOS Neglected Tropical Diseases* 12:  
452 e0006114
- 453 26. Lim MD, Brooker SJ, Jr VYB, Gay-Andrieu F, Gilleard J, Levecke B, Lieshout L van,  
454 Medley GF, Mekonnen Z, Mirams G, Njenga SM, Odiere MR, Rudge JW, Stuyver L,  
455 Vercruysse J, et al., 2018. Diagnostic tools for soil-transmitted helminths control  
456 and elimination programs: A pathway for diagnostic product development. *PLOS  
457 Neglected Tropical Diseases* 12: e0006213
- 458 27. Truscott JE, Hardwick RJ, Werkman M, Saravanakumar PK, Manuel M, Ajjampur SSR,  
459 Ásbjörnsdóttir KH, Khumbo K, Witek-McManus S, Simwanza J, Cottrell G,  
460 Houngbégnon P, Ibikounlé M, Walson JL, Anderson RM., 2021. Forecasting the  
461 effectiveness of the DeWorm3 trial in interrupting the transmission of soil-

- 462 transmitted helminths in three study sites in Benin, India and Malawi. *Parasites &*  
463 *Vectors* 14: 67
- 464 28. Mekete K, Ower A, Dunn J, Sime H, Tadesse G, Abate E, Nigussu N, Seife F,  
465 McNaughton E, Anderson RM, Phillips AE., 2019. The Geshiyaro Project: a study  
466 protocol for developing a scalable model of interventions for moving towards the  
467 interruption of the transmission of soil-transmitted helminths and schistosome  
468 infections in the Wolaita zone of Ethiopia. *Parasites & Vectors* 12: 503
- 469 29. Dunn JC, Papaikovou M, Han KT, Choonea D, Bettis AA, Wyine NY, Lwin AMM,  
470 Maung NS, Misra R, Littlewood DTJ, Anderson RM., 2020. The increased sensitivity  
471 of qPCR in comparison to Kato-Katz is required for the accurate assessment of the  
472 prevalence of soil-transmitted helminth infection in settings that have received  
473 multiple rounds of mass drug administration. *Parasites & Vectors* 13
- 474 30. Cools P, Vlamincck J, Albonico M, Ame S, Ayana M, José Antonio BP, Cringoli G, Dana  
475 D, Keiser J, Maurelli MP, Maya C, Matoso LF, Montresor A, Mekonnen Z, Mirams G,  
476 et al., 2019. Diagnostic performance of a single and duplicate Kato-Katz, Mini-  
477 FLOTAC, FECPAKG2 and qPCR for the detection and quantification of soil-  
478 transmitted helminths in three endemic countries. *PLoS Negl Trop Dis* 13: e0007446
- 479 31. Levecke B, Cools P, Albonico M, Ame S, Angebault C, Ayana M, Behnke JM, Bethony  
480 JM, Cringoli G, Dana D, Guillard B, Viet Hoa NT, Kang G, Kattula D, Keiser J, et al.,  
481 2020. Identifying thresholds for classifying moderate-to-heavy soil-transmitted  
482 helminth intensity infections for FECPAKG2, McMaster, Mini-FLOTAC and qPCR.  
483 *PLoS Negl Trop Dis* 14: e0008296
- 484 32. Keller L, Patel C, Welsche S, Schindler T, Hürlimann E, Keiser J., 2020. Performance  
485 of the Kato-Katz method and real time polymerase chain reaction for the diagnosis  
486 of soil-transmitted helminthiasis in the framework of a randomised controlled trial:  
487 treatment efficacy and day-to-day variation. *Parasit Vectors* 13: 517
- 488 33. Zendejas-Heredia PA, Colella V, Hii SF, Traub RJ., 2021. Comparison of the egg  
489 recovery rates and limit of detection for soil-transmitted helminths using the Kato-  
490 Katz thick smear, faecal flotation and quantitative real-time PCR in human stool.  
491 *PLoS Negl Trop Dis* 15: e0009395
- 492 34. Pilotte N, Papaikovou M, Grant JR, Bierwert LA, Llewellyn S, McCarthy JS, Williams  
493 SA., 2016. Improved PCR-Based Detection of Soil Transmitted Helminth Infections  
494 Using a Next-Generation Sequencing Approach to Assay Design. *PLOS Neglected*  
495 *Tropical Diseases* 10: e0004578
- 496 35. Pilotte N, Maasch JRMA, Easton AV, Dahlstrom E, Nutman TB, Williams SA., 2019.  
497 Targeting a highly repeated germline DNA sequence for improved real-time PCR-  
498 based detection of *Ascaris* infection in human stool. *PLOS Neglected Tropical*  
499 *Diseases* 13: e0007593
- 500 36. Grant JR, Pilotte N, Williams SA., 2019. A Case for Using Genomics and a  
501 Bioinformatics Pipeline to Develop Sensitive and Species-Specific PCR-Based  
502 Diagnostics for Soil-Transmitted Helminths. *Frontiers in Genetics* 10
- 503 37. Ng SKA, Holden L, Sun J., 2012. Identifying comorbidity patterns of health  
504 conditions via cluster analysis of pairwise concordance statistics. *Statistics in*  
505 *medicine* 31

- 506 38. Landis JR, Koch GG., 1977. The Measurement of Observer Agreement for  
507 Categorical Data. *Biometrics* 33: 159–174
- 508 39. Bryan PE, Romero M, Sánchez M, Torres G, Gómez W, Restrepo M, Restrepo A,  
509 Mejia R., 2020. Urban versus Rural Prevalence of Intestinal Parasites Using Multi-  
510 Parallel qPCR in Colombia. *Am J Trop Med Hyg*
- 511 40. Nolan MS, Murray KO, Mejia R, Hotez PJ, Villar Mondragon MJ, Rodriguez S,  
512 Palacios JR, Murcia Contreras WE, Lynn MK, Torres ME, Monroy Escobar MC., 2021.  
513 Elevated Pediatric Chagas Disease Burden Complicated by Concomitant Intestinal  
514 Parasites and Malnutrition in El Salvador. *Trop Med Infect Dis* 6
- 515 41. WHO Health Organisation. (2020). Ending the neglect to attain the sustainable  
516 development goals: a road map for neglected tropical diseases 2021-2030:  
517 overview  
518  
519
